# Supplementary material for: Impact of orthophosphate on the solubility and properties of lead orthophosphate nanoparticles
Source: Royal Society of Chemistry journal article supplement (doi:10.1039/d4ew00152d), 2024-01-01
Supplement: d4ew00152d1.pdf [file d4ew00152d1.pdf]

**Impact of Orthophosphate on the Solubility and Properties of Lead Orthophosphate  
Nanoparticles**

**Supplemental Information**

Casey L. Formal<sup>1</sup>, Darren A. Lytle<sup>2\*</sup>, Stephen Harmon<sup>2</sup>, David G. Wahman<sup>2</sup>, Michael K.  
DeSantis<sup>2</sup>, and Min Tang<sup>3</sup>

**Table S1.** Literature reported log solubility product constant ( $K_{sp}$ ) summary for chloropyromorphite,  $Pb_5(PO_4)_3Cl$ , and hydroxypyromorphite,  $Pb_5(PO_4)_3OH$ \*.

| Source                                      | $Pb_5(PO_4)_3Cl$<br>log $K_{sp,Cl}$ | $Pb_5(PO_4)_3OH$<br>log $K_{sp,OH}$ | Solid Separation                                                        |
|---------------------------------------------|-------------------------------------|-------------------------------------|-------------------------------------------------------------------------|
| Flis <i>et al.</i> 2011 <sup>1</sup>        | -86.5                               | --                                  | Decantation                                                             |
| Schecher and McAvoy, 1998 <sup>2</sup>      | -84.43                              | -62.79                              |                                                                         |
| Nriagu, 1972; Nriagu, 1973 <sup>3,4</sup>   | -79.6                               | -62.83                              |                                                                         |
| Sternleib <i>et al.</i> , 2010 <sup>5</sup> | -86.5                               | -65                                 | Centrifuged and supernatant passed through 0.45 $\mu m$ membrane filter |
| Topolska <i>et al.</i> , 2016 <sup>6</sup>  | -79.6                               | --                                  | Decantation                                                             |
| Xie and Giammar, 2007 <sup>7</sup>          | -80.4                               | --                                  | 0.2 $\mu m$ membrane filter                                             |
| Zhu <i>et al.</i> , 2015 <sup>8</sup>       | --                                  | -66.77                              | 0.22 $\mu m$ membrane filter                                            |

\* Expressed as:  $Pb_5(PO_4)_3OH(s) + H^+ \rightleftharpoons 5Pb^{2+} + 3PO_4^{3-} + H_2O$

## References

1. Flis, J.; Manecki, M.; Bajda, T., Solubility of pyromorphite  $Pb_5(PO_4)_3Cl$ –mimetite  $Pb_5(AsO_4)_3Cl$  solid solution series. *Geochimica et Cosmochimica Acta* **2011**, *75*, (7), 1858-1868.
2. Schecher, W.; McAvoy, D., MINEQL+ Version 4.5. *Environmental Research Software, Hallowell, Maine, USA* **1998**.
3. Nriagu, J. O., Lead orthophosphates. I. Solubility and hydrolysis of secondary lead orthophosphate. *Inorganic Chemistry* **1972**, *11*, (10), 2499-2503.
4. Nriagu, J. O., Lead orthophosphates—II. Stability of chloropyromorphite at 25 C. *Geochimica et Cosmochimica Acta* **1973**, *37*, (3), 367-377.
5. Sternlieb, M. P.; Pasteris, J. D.; Williams, B. R.; Krol, K. A.; Yoder, C. H., The structure and solubility of carbonated hydroxyl and chloro lead apatites. *Polyhedron* **2010**, *29*, (11), 2364-2372.
6. Topolska, J.; Manecki, M.; Bajda, T.; Borkiewicz, O.; Budzewski, P., Solubility of pyromorphite  $Pb_5(PO_4)_3Cl$  at 5–65°C and its experimentally determined thermodynamic parameters. *The Journal of Chemical Thermodynamics* **2016**, *98*, 282-287.
7. Xie, L.; Giammar, D. E., Equilibrium Solubility and Dissolution Rate of the Lead Phosphate Chloropyromorphite. *Environmental Science & Technology* **2007**, *41*, (23), 8050-8055.
8. Zhu, Y.; Zhu, Z.; Zhao, X.; Liang, Y.; Huang, Y., Characterization, dissolution, and solubility of lead hydroxypyromorphite  $[Pb_5(PO_4)_3OH]$  at 25–45° C. *Journal of Chemistry* **2015**, *2015*.

**Table S2.** Lead solubility model equilibria and constants at 25 °C and 0 M ionic strength from Schock, Wagner and Oliphant<sup>26</sup> and references therein, unless otherwise noted.

| Name                              | Equilibrium                                                                     | log Constant         |
|-----------------------------------|---------------------------------------------------------------------------------|----------------------|
| Potential Controlling Solids      |                                                                                 |                      |
| $K_{sp,OH}$                       | $Pb_5(PO_4)_3OH(s) + H^+ \rightleftharpoons 5Pb^{2+} + 3PO_4^{3-} + H_2O$       | -62.83               |
| $K_{sp,Cl}$                       | $Pb_5(PO_4)_3Cl(s) \rightleftharpoons 5Pb^{2+} + 3PO_4^{3-} + Cl^-$             | -79.6 <sup>a</sup>   |
| $K_{sp,HC}$                       | $Pb_3(CO_3)_2(OH)_2(s) + 2H^+ \rightleftharpoons 3Pb^{2+} + 2CO_3^{2-} + 2H_2O$ | -18.00               |
| $K_{sp,C}$                        | $PbCO_3(s) \rightleftharpoons Pb^{2+} + CO_3^{2-}$                              | -13.11               |
| Hydroxide Complexes               |                                                                                 |                      |
| $\beta_{1,OH}$                    | $Pb^{2+} + H_2O \rightleftharpoons PbOH^+ + H^+$                                | -7.22                |
| $\beta_{2,OH}$                    | $Pb^{2+} + 2H_2O \rightleftharpoons Pb(OH)_{2(aq)} + 2H^+$                      | -16.91               |
| $\beta_{3,OH}$                    | $Pb^{2+} + 3H_2O \rightleftharpoons Pb(OH)_3^- + 3H^+$                          | -28.08               |
| $\beta_{4,OH}$                    | $Pb^{2+} + 4H_2O \rightleftharpoons Pb(OH)_4^{2-} + 4H^+$                       | -39.72               |
| $\beta_{2,1,OH}$                  | $2Pb^{2+} + H_2O \rightleftharpoons Pb_2OH^{3+} + H^+$                          | -6.36                |
| $\beta_{3,4,OH}$                  | $3Pb^{2+} + 4H_2O \rightleftharpoons Pb_3(OH)_4^{2+} + 4H^+$                    | -23.86               |
| $\beta_{4,4,OH}$                  | $4Pb^{2+} + 4H_2O \rightleftharpoons Pb_4(OH)_4^{4+} + 4H^+$                    | -20.88               |
| $\beta_{6,8,OH}$                  | $6Pb^{2+} + 8H_2O \rightleftharpoons Pb_6(OH)_8^{4+} + 8H^+$                    | -43.62               |
| Chloride Complexes                |                                                                                 |                      |
| $K_{1,Cl}$                        | $Pb^{2+} + Cl^- \rightleftharpoons PbCl^+$                                      | 1.59                 |
| $\beta_{2,Cl}$                    | $Pb^{2+} + 2Cl^- \rightleftharpoons PbCl_{2(aq)}$                               | 1.80                 |
| $\beta_{3,Cl}$                    | $Pb^{2+} + 3Cl^- \rightleftharpoons PbCl_3^-$                                   | 1.71                 |
| $\beta_{4,Cl}$                    | $Pb^{2+} + 4Cl^- \rightleftharpoons PbCl_4^{2-}$                                | 1.43                 |
| Carbonate Complexes and Acid-Base |                                                                                 |                      |
| $K_{c1}$                          | $H_2CO_3^* \rightleftharpoons HCO_3^- + H^+$                                    | -6.355 <sup>b</sup>  |
| $K_{c2}$                          | $HCO_3^- \rightleftharpoons H^+ + CO_3^{2-}$                                    | -10.336 <sup>b</sup> |
| $K_{1,CO3}$                       | $Pb^{2+} + H^+ + CO_3^{2-} \rightleftharpoons PbHCO_3^+$                        | 12.59                |
| $K_{2,CO3}$                       | $Pb^{2+} + CO_3^{2-} \rightleftharpoons PbCO_{3(aq)}$                           | 7.10                 |
| $K_{3,CO3}$                       | $Pb^{2+} + 2CO_3^{2-} \rightleftharpoons Pb(CO_3)_2^{2-}$                       | 10.33                |
| Phosphate Complexes and Acid-Base |                                                                                 |                      |
| $K_{p1}$                          | $H_3PO_4 \rightleftharpoons H^+ + H_2PO_4^-$                                    | -2.141 <sup>b</sup>  |
| $K_{p2}$                          | $H_2PO_4^- \rightleftharpoons H^+ + HPO_4^{2-}$                                 | -7.200 <sup>b</sup>  |
| $K_{p3}$                          | $HPO_4^{2-} \rightleftharpoons H^+ + PO_4^{3-}$                                 | -12.338 <sup>b</sup> |
| $K_{1,PO4}$                       | $Pb^{2+} + H^+ + PO_4^{3-} \rightleftharpoons PbHPO_{4(aq)}$                    | 15.41                |
| $K_{2,PO4}$                       | $Pb^{2+} + 2H^+ + PO_4^{3-} \rightleftharpoons PbH_2PO_4^+$                     | 21.05                |

<sup>a</sup> Topolska *et al.*, 2016<sup>29</sup>; <sup>b</sup>Powell, *et al.* (2005)<sup>43</sup>

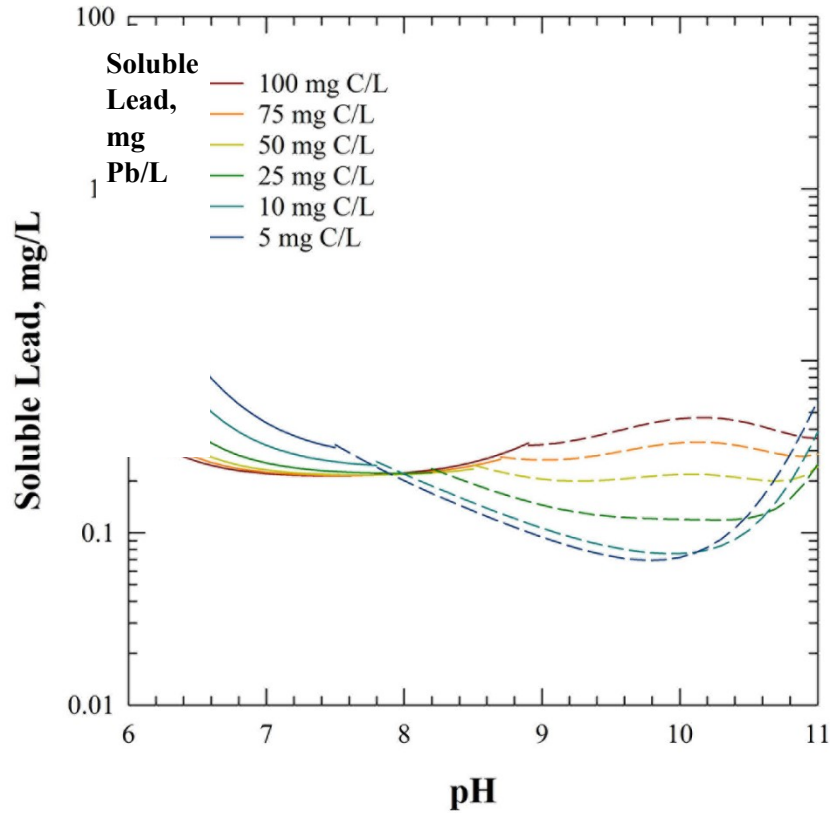

**Figure S1.** Simulated soluble lead concentrations as a function of pH and dissolved inorganic carbon (mg C/L) concentrations, considering only cerussite ( $\log K_{sp,C} = -13.11$ ) or hydrocerussite ( $\log K_{sp,HC} = -18.00$ ) as potential controlling solids.<sup>28,29</sup> Solid and dashed lines indicate cerussite or hydrocerussite solid control, respectively.

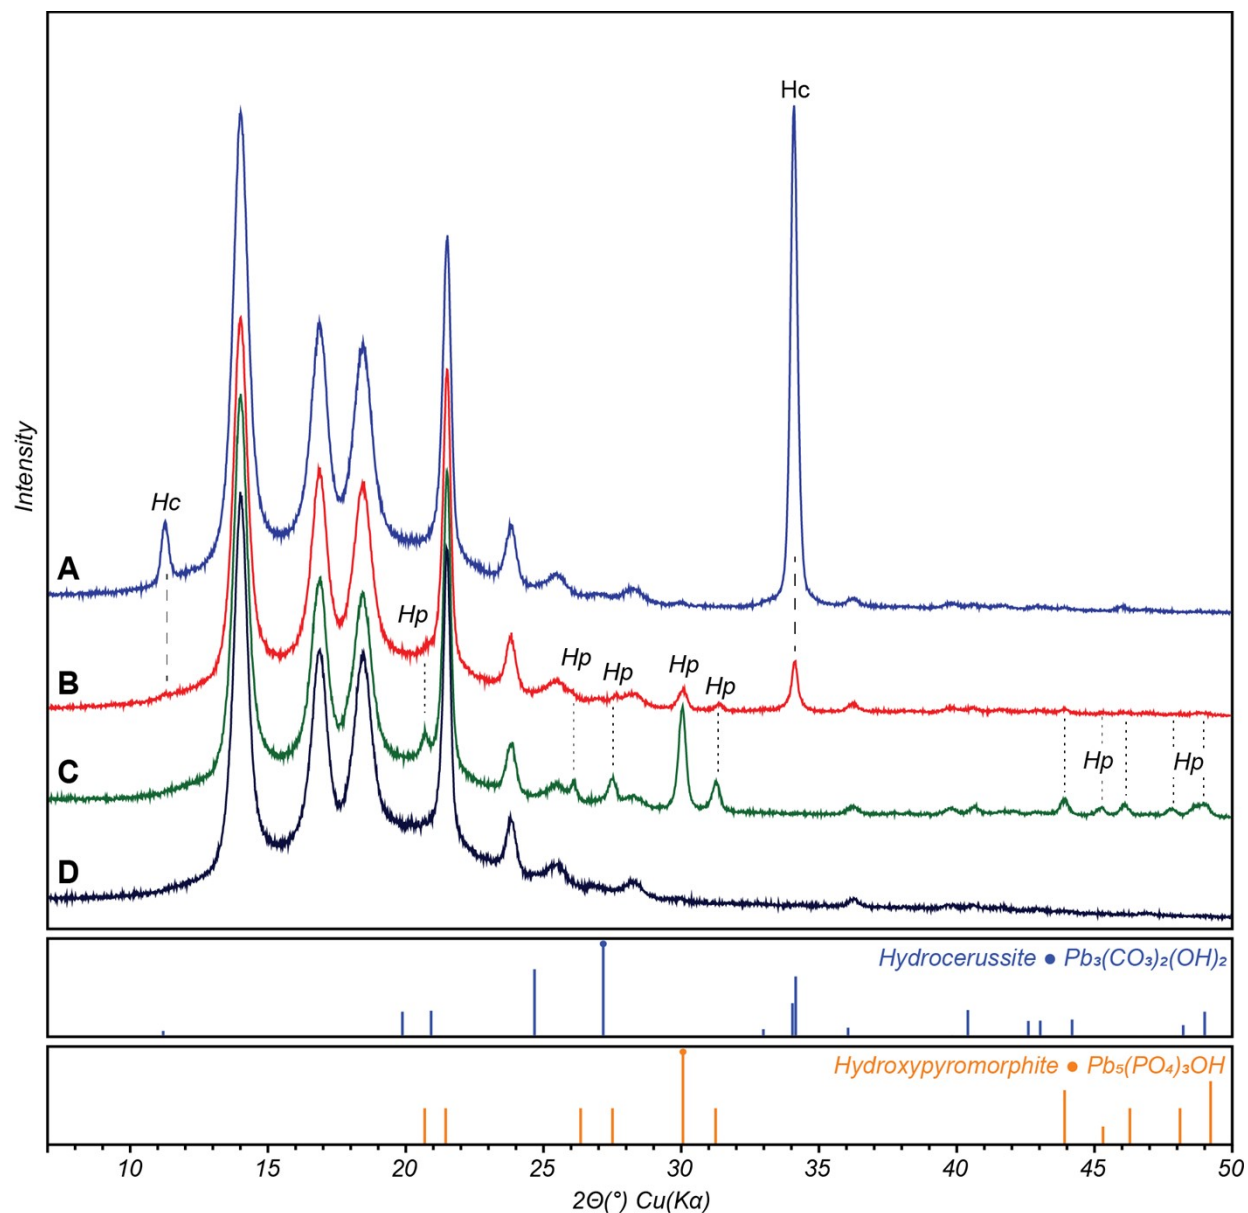

**Figure S2.** Powder X-ray diffraction (XRD) patterns of selected experiments: (a) 9510, hydrocerussite, the XRD pattern shows only two characteristic hydrocerussite peaks because the platy crystals settled onto the filter in a preferred orientation which accentuated the signal from one crystallographic plane, (b) 95101, mixed hydrocerussite and hydroxyppyromorphite, (c) 95102, hydroxyppyromorphite, and (d) blank ultrafilter, shows several broad diffraction peaks which are characteristic of the filter material.

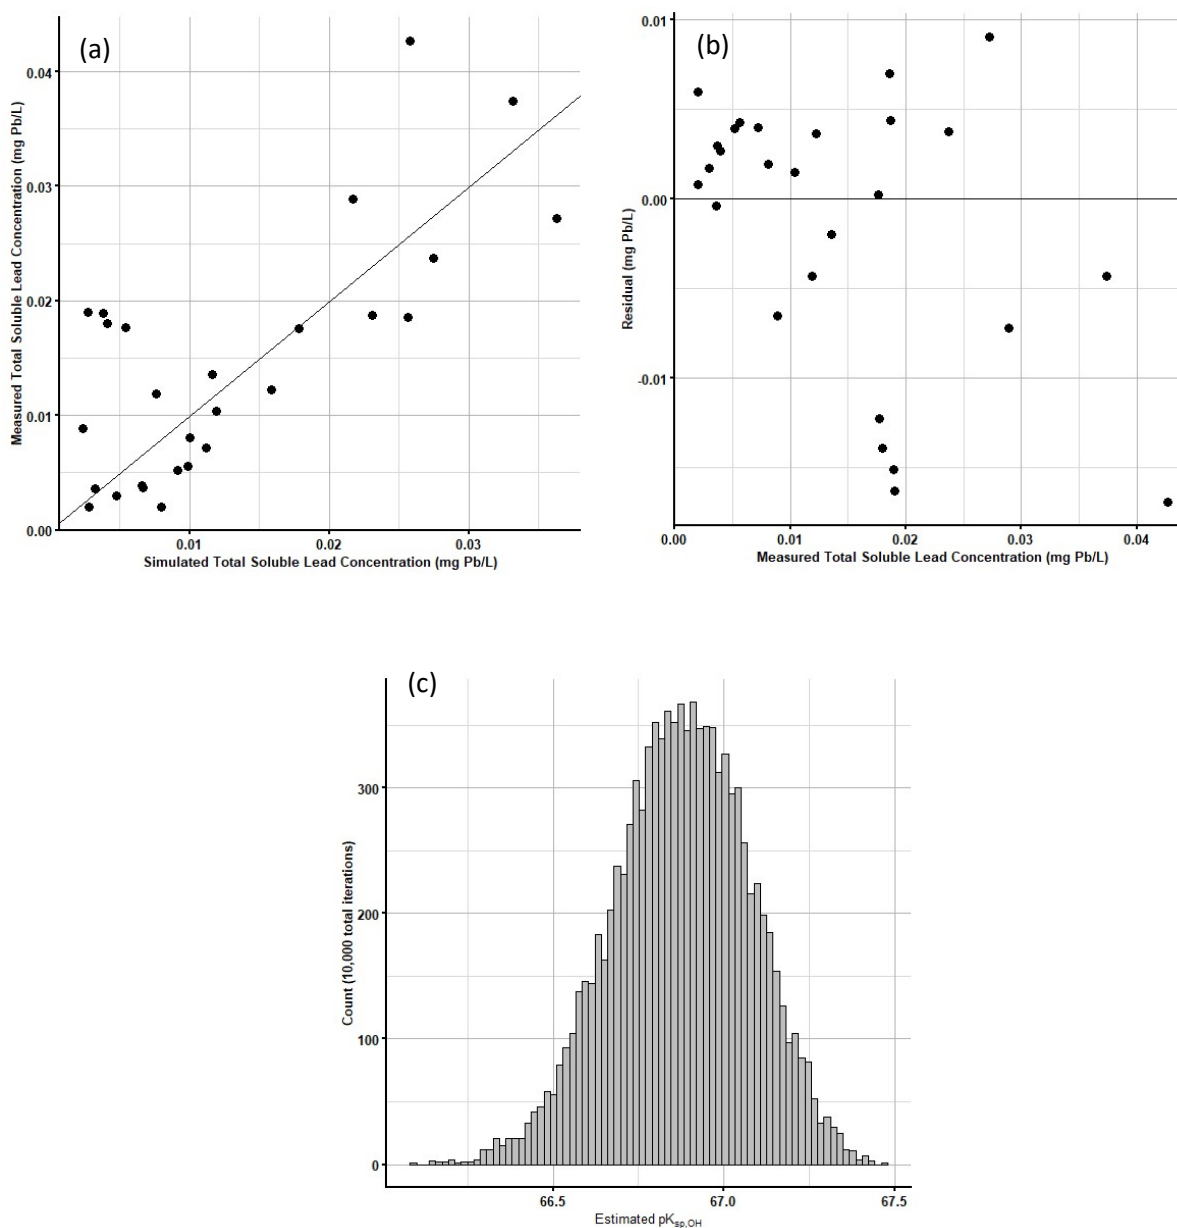

**Figure S3.** Results from  $K_{sp,OH}$  estimation ( $10^{-66.87}$ ): (a) 1:1 correlation plot between experimental data and model simulated total soluble lead concentrations ( $R^2=0.54$ ), (b) residuals plot of experimental data and model simulated total soluble lead concentrations, and (c) histogram of bootstrap ( $n = 10,000$ ) results used to determine the 95% confidence interval of the  $K_{sp,OH}$  estimate that also illustrates a normal distribution in the estimated  $pK_{sp,OH}$  uncertainty.
